# Supplementary material for: Influences of sudden stratospheric warmings on the ionosphere above Okinawa
Source: Copernicus journal article supplement (doi:10.5194/egusphere-2024-485), 2024-02-21

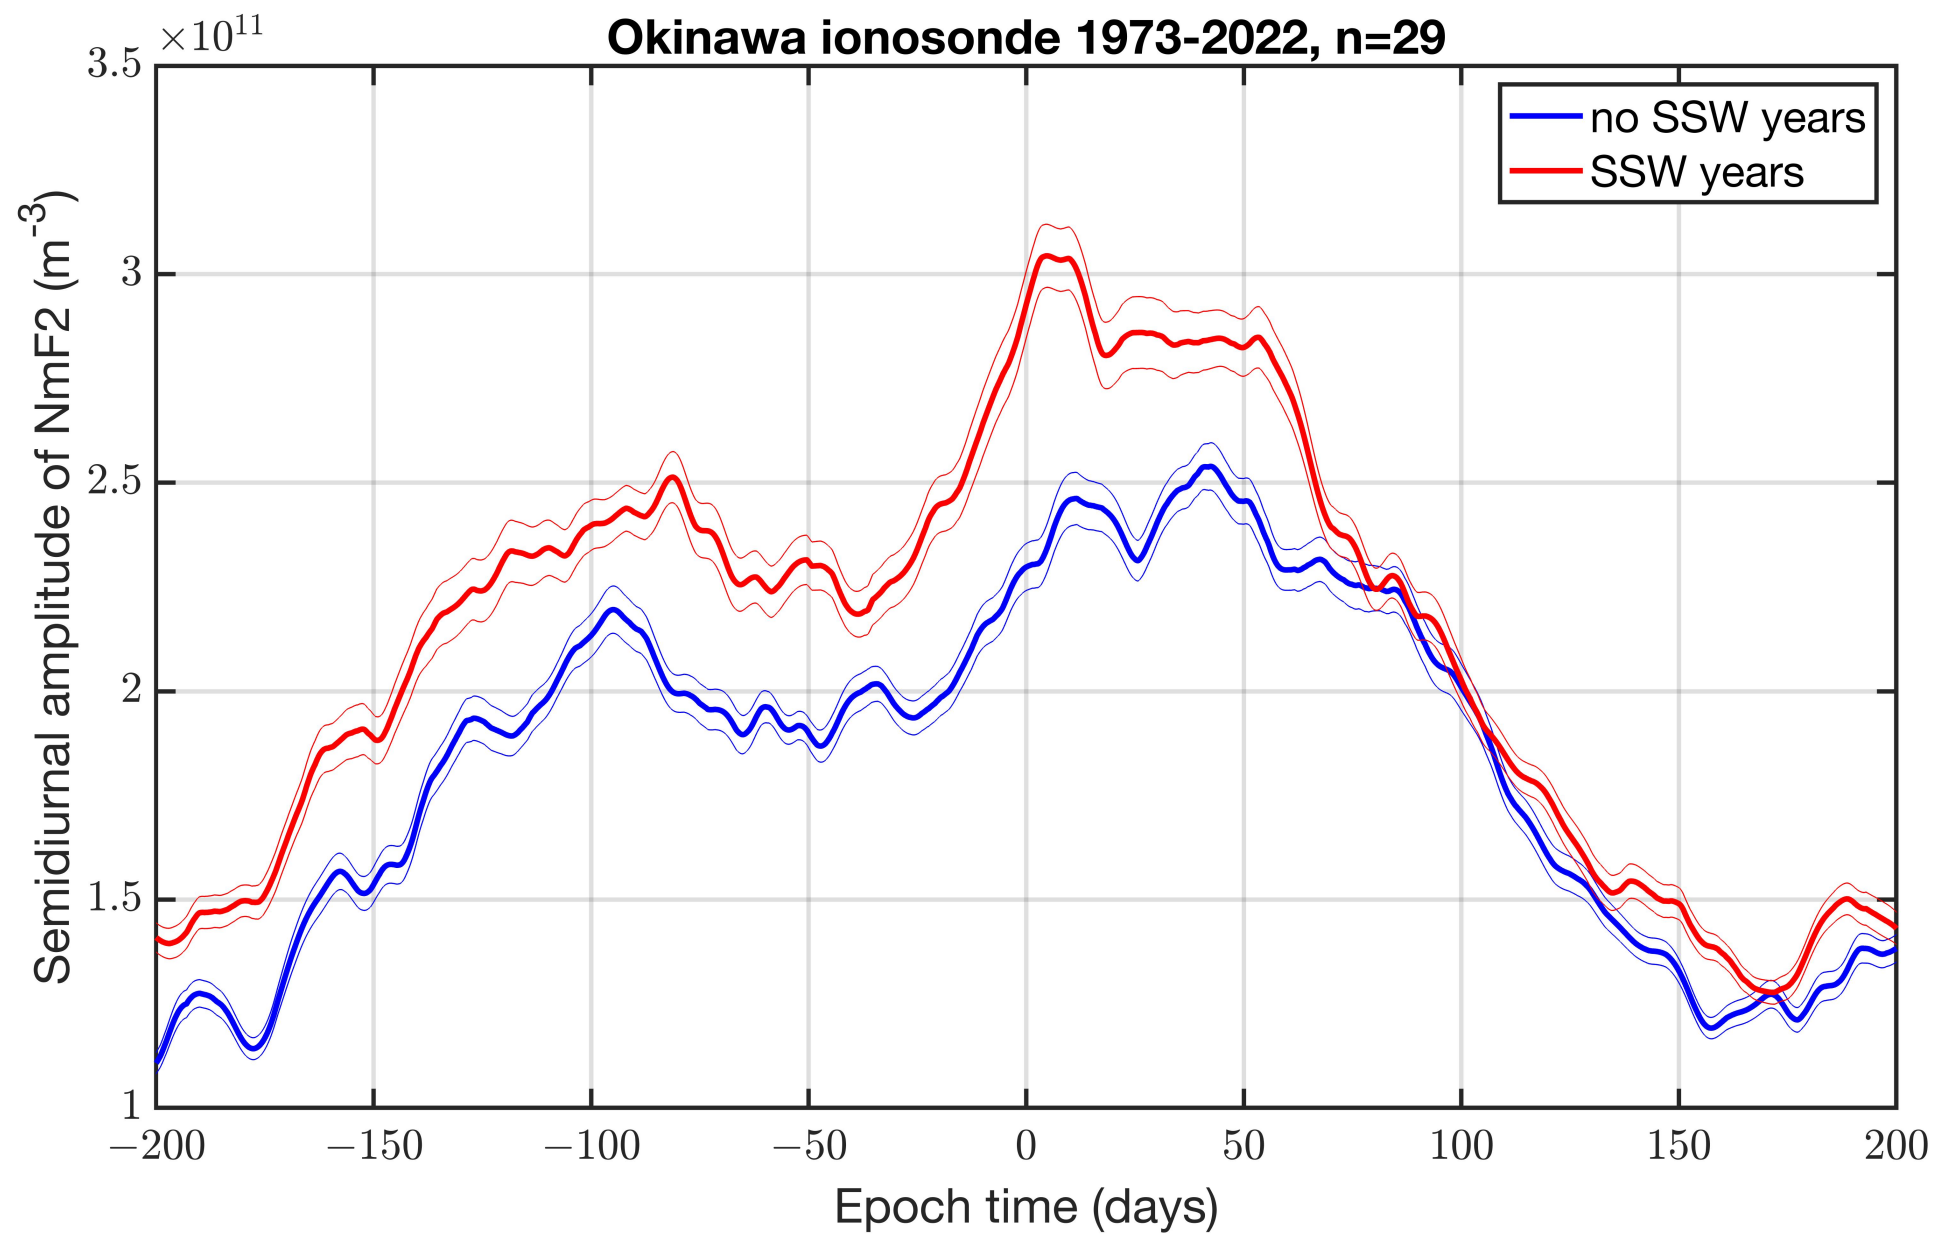

Supplement: Supplementary file [file egusphere-2024-485-AC2-supplement.pdf]
